# Supplementary material for: Metallomics for drug development: an integrated CE-ICP-MS and ICP-MS approach reveals the speciation changes for an investigational ruthenium(iii) drug bound to holo-transferrin in simulated cancer cytosol
Source: Royal Society of Chemistry journal article supplement (doi:10.1039/c3mt00092c), 2013-01-01
Supplement: c3mt00092c.pdf [file c3mt00092c.pdf]

## Electronic Supplementary Information

### Binding kinetic experiments

The kinetics of interaction between **I** and holo-transferrin was studied under simulated extracellular conditions. Samples of  $2.5 \times 10^{-5}$  or  $1 \times 10^{-4}$  M **I** and  $5 \times 10^{-5}$  M protein (1:2 and 2:1 ratios) were incubated in 10 mM phosphate buffer containing 100 mM sodium chloride, pH 7.4 at 37°C. Aliquots of the reaction mixture were continuously taken for CE-ICP-MS analysis to monitor the time-dependent changes in the peak areas of Ru-containing species (see Figure 2). To visualize these changes, Figure S-1 is given. The reaction rate constant ( $k$ ) was assessed from the polynomial approximation of the adduct response vs. time plot by assuming the first-order character of the binding reaction, *i.e.*, the validity of an equation:

$$\ln \frac{X_{drug}^{bound}}{C_{drug}^0} = -kt$$

where  $X_{drug}^{bound}$  is the relative adduct signal area (adduct peak area divided on the sum of all peak areas) and  $C_{drug}^0$  represents the initial concentration of the drug. The validity of this assumption has been previously confirmed in similar kinetic measurements (see ref 15).

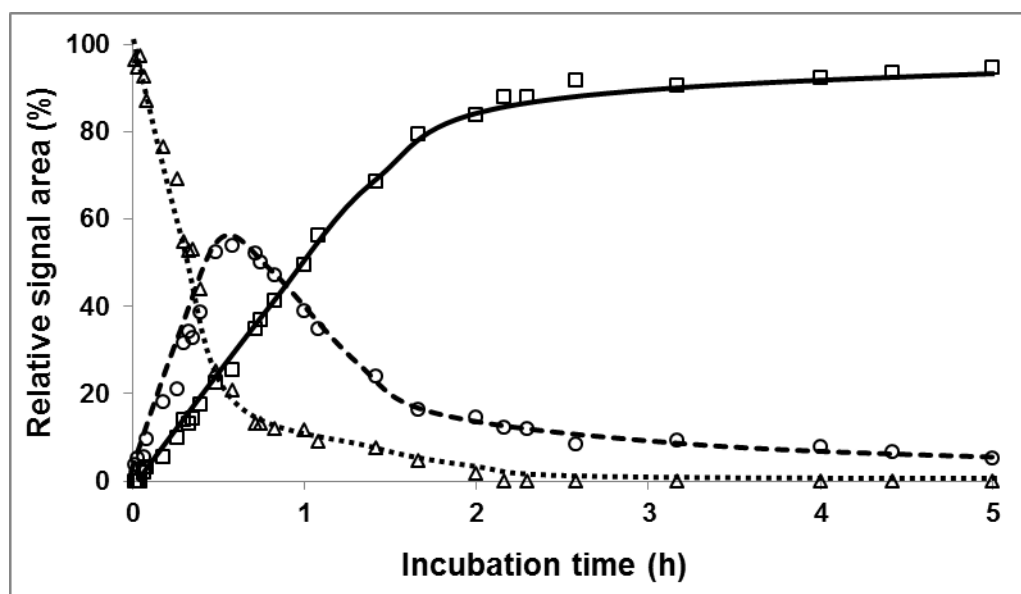

**Figure S-1.** Evolution of the Ru-holo-transferrin adduct (squares), **I** (triangles), and the intermediate product (circles) concentrations at a ruthenium-to-protein ratio of 2:1.

**Table S-1** ICP-MS instrumental/operating parameters<sup>a</sup>

| Parameter                                | Setting                |
|------------------------------------------|------------------------|
| generator output power, W                | 1250                   |
| nebulizer                                | PolyCon                |
| nebulizer chamber                        | quartz, cooling at 3°C |
| flow-rate of plasma-forming argon, L/min | 13                     |
| flow-rate of auxiliary argon, L/min      | 0.9                    |
| flow-rate of argon into atomizer, L/min  | 0.95                   |
| flow-rate of the analyzed sample, mL/min | 0.8                    |
| resolution, M                            | 0.7                    |
| dwel time, ms                            | 0.6                    |
| number of runs                           | 10                     |
| channels per mass                        | 10                     |

<sup>a</sup>X-7, Thermo Elemental, USA.

**Table S-2** Typical levels of the components of reaction mixtures

| Component     | Concentration (M) <sup>a</sup>                                 |
|---------------|----------------------------------------------------------------|
| <b>I</b>      | $5 \times 10^{-6} - 1.5 \times 10^{-4}$ ( $1 \times 10^{-4}$ ) |
| transferrin   | $4 \times 10^{-5}$ ( $5 \times 10^{-5}$ )                      |
| glutathione   | $5 \times 10^{-4} - 1 \times 10^{-2}$ ( $1 \times 10^{-2}$ )   |
| ascorbic acid | 0.01 (0.01)                                                    |
| citric acid   | 0.05– 0.1 (0.05)                                               |

<sup>a</sup>Given in parentheses is the concentration chosen for this study.
